# Supplementary material for: Deptor Enhances Triple-Negative Breast Cancer Metastasis and Chemoresistance through Coupling to Survivin Expression
Source: PubMed Central journal article supplement — Neoplasia. 2015 Mar 23;17(3):317–28. doi: 10.1016/j.neo.2015.02.003 (PMC4372649; doi:10.1016/j.neo.2015.02.003), 2015-03-23
Supplement: mmc1.pdf [file mmc1.pdf]

## Supplementary Information

### **Deptor Enhances Triple-negative Breast Cancer Metastasis and Chemoresistance *via* Coupling to Survivin Expression**

**Jenny G. Parvani<sup>1</sup>, Gangarao Davuluri<sup>2</sup>, Michael K. Wendt<sup>3</sup>, Christine Espinosa<sup>1</sup>, Maozhen Tian<sup>1</sup>, David Danielpour<sup>1</sup>, Khalid Sossey-Alaoui<sup>2</sup> and William P. Schieman<sup>1</sup>**

**Author Affiliation:** <sup>1</sup>Case Comprehensive Cancer Center, Case Western Reserve University, Cleveland, OH 44106. <sup>2</sup>Department of Molecular Cardiology, Cleveland Clinic Lerner Research Institute, 9500, Cleveland, OH 44195. <sup>3</sup>Department of Medicinal Chemistry and Molecular Pharmacology, Purdue University, West Lafayette, IN, 47907.

**Corresponding Author:** William P. Schieman, Case Comprehensive Cancer Center, Case Western Reserve University, Wolstein Research Building, 2103 Cornell Road, Cleveland, OH 44106. Phone: (216) 368-5763. Fax: (216) 368-1166. Email: [wps20@case.edu](mailto:wps20@case.edu)

**Running Title:** Deptor Induces Survivin-dependent Chemoresistance

**Table S1: Pharmacological inhibitors or chemicals**

| Name                 | Target               | Concentration | Supplier                           |
|----------------------|----------------------|---------------|------------------------------------|
| SB431542             | T $\beta$ R-I        | 10 $\mu$ M    | EMD Millipore (Billerica, MA, USA) |
| T $\beta$ R-I Inh II | T $\beta$ R-I        | 10 $\mu$ g/ml | EMD Millipore                      |
| SB203580             | p38 MAPK             | 10 $\mu$ M    | BD Biosciences (San Jose, CA, USA) |
| SIS3                 | Smad3                | 10 $\mu$ M    | EMD Millipore                      |
| 5-Fluorouracil       | Thymidylate synthase | 10 $\mu$ M    | Sigma (St. Louis, MO, USA)         |
| Hydrogen Peroxide    | --                   | 50 $\mu$ M    | Sigma                              |
| Tamoxifen            | ER $\alpha$          | 0.1 nM        | Sigma                              |
| Fulvestrant (ICI)    | ER $\alpha$          | 1 $\mu$ M     | Calbiochem                         |
| Doxorubicin          | DNA                  | 50 nM         | Cayman Chemicals                   |
| Paclitaxel           | Microtubules         | 50 nM         | LC Laboratories                    |

Shown are the final concentrations of the pharmacological antagonists and used inhibit the indicated proteins or cellular targets. Also provided are the vendors where these reagents were obtained.

**Table S2: Immunoblotting antibodies**

| Antibody         | Dilution | Supplier                                         |
|------------------|----------|--------------------------------------------------|
| Deptor           | 1:1000   | Novus Biologicals (Littleton, CO, USA)           |
| Phospho-S473-Akt | 1:1000   | Cell Signaling Technologies (Danvers, MA, USA)   |
| Akt              | 1:1000   | Cell Signaling Technologies                      |
| Phospho-S6K      | 1:1000   | Cell Signaling Technologies                      |
| S6K              | 1:1000   | Cell Signaling Technologies                      |
| ER $\alpha$      | 1:500    | Santa Cruz Biotechnologies (Santa Cruz, CA, USA) |

|                    |        |                             |
|--------------------|--------|-----------------------------|
| Twist              | 1:250  | Abcam (Cambridge, MA, USA)  |
| $\beta$ 3 Integrin | 1:1000 | Cell Signaling Technologies |
| Survivin           | 1:1000 | Cell Signaling Technologies |
| $\beta$ -actin     | 1:1000 | Santa Cruz Biotechnologies  |

Shown are the antibodies and dilutions used to visualize the indicated proteins. Also provided are the vendors where these reagents were obtained.

**TABLE S3: Real-time PCR primer pairs**

| Target      | Application   | Sequence (5' to 3')          |
|-------------|---------------|------------------------------|
| GAPDH       | PCR-Sense     | 5'-CAACTTTGGCATTGTGGAAGGGCTC |
| GAPDH       | PCR-Antisense | 5'-GCAGGGATGATGTTCTGGGCAGC   |
| mDeptor     | PCR-Sense     | 5'-TTCCAGATAGAAGGCTCCAGCACC  |
| mDeptor     | PCR-Antisense | 5'-AAGCAACCCGTCAAAGCACTCG    |
| hSurvivin   | PCR-Sense     | 5'-TGACGACCCCATAGAGGAACA     |
| hSurvivin   | PCR-Antisense | 5'-CAGTAGAGGAGCCAGGGACT      |
| mE-cadherin | PCR-Sense     | 5'-CCCTACATACTCTGGTGGTTCA    |
| mE-Cadherin | PCR-Antisense | 5'-GGCATCATCATCGGTCACCTTG    |
| hE-cadherin | PCR-Sense     | 5'-CATCTTTGTGCCTCCTGAAA      |
| hE-cadherin | PCR-Antisense | 5'-TGGGCAGTGTAGGATGTGAT      |
| mCK-19      | PCR-Sense     | 5'-TTGGGTCAGGGGGTGTTTTC      |
| mCK-19      | PCR-Antisense | 5'-TTCTCATTGCCAGACAGCAGC     |
| hCK-19      | PCR-Sense     | 5'-GACCTTGGAGGCAGACAAAT      |
| hCK-19      | PCR-Antisense | 5'-GATAGTGAGCGGCAGAATCA      |

**Figure S1: Parvani et al**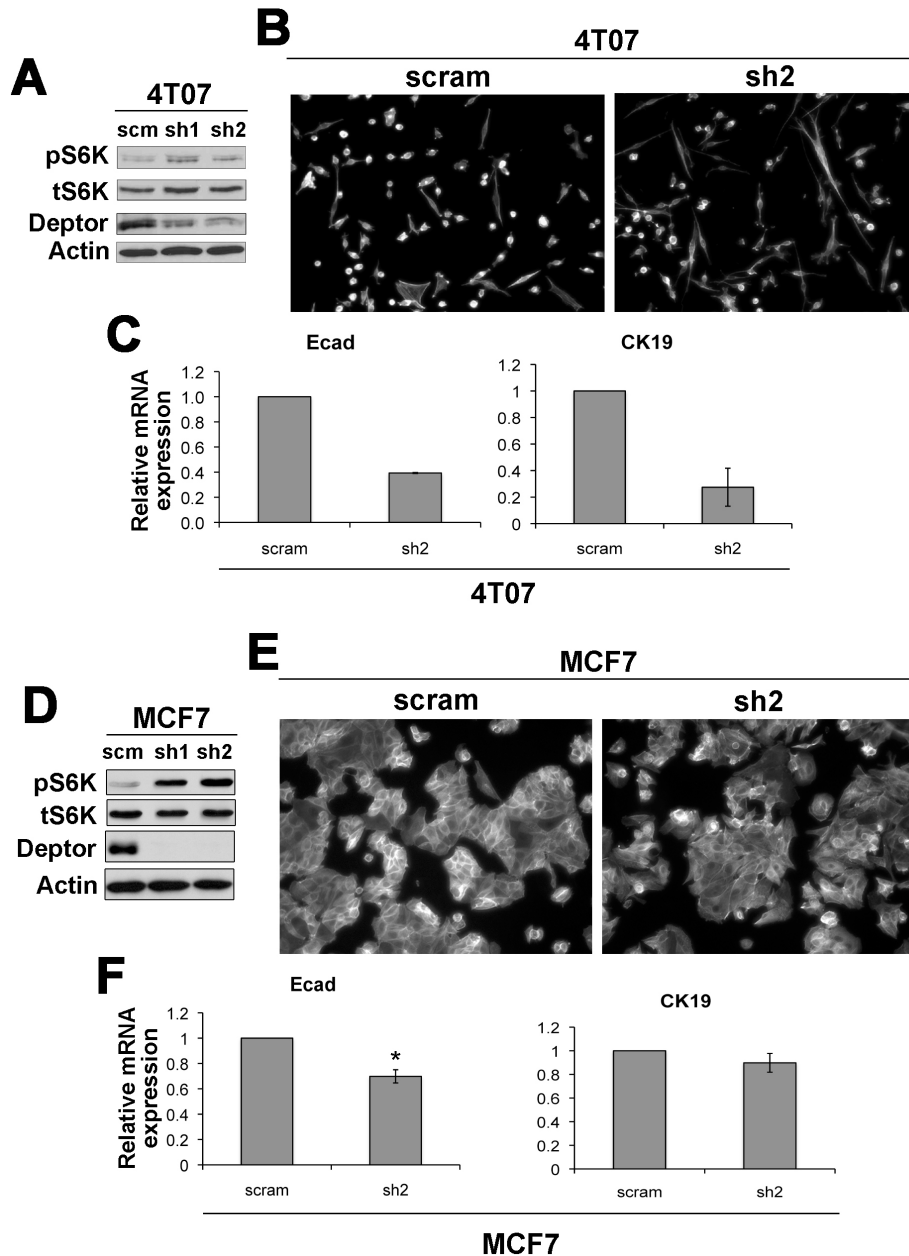

**Figure S1.** Deptor-deficiency induces EMT in malignant MECs. (A and D) Deptor-deficiency (sh1 and sh2) activates S6K activity in 4T07 (A) or MCF7 (D) cells. Immunoblots are representative images from 3 independent experiments. (B and E) Phalloidin staining of control (scram) and Deptor-deficient (sh2) 4T07 (B) or MCF7 (E) cells to monitor alterations in the actin cytoskeleton. Images are representative of 2 independent experiments. (C and F) Deptor-deficiency elicits loss of epithelial gene expression patterns, including that of E-cadherin (E-Cad) and cytokeratin-19 (CK19) as determined by semi-quantitative real-time PCR. Data are the mean ( $\pm$ SEM;  $n=3$ ;  $*P<0.05$ ).

**Figure S2: Parvani et al**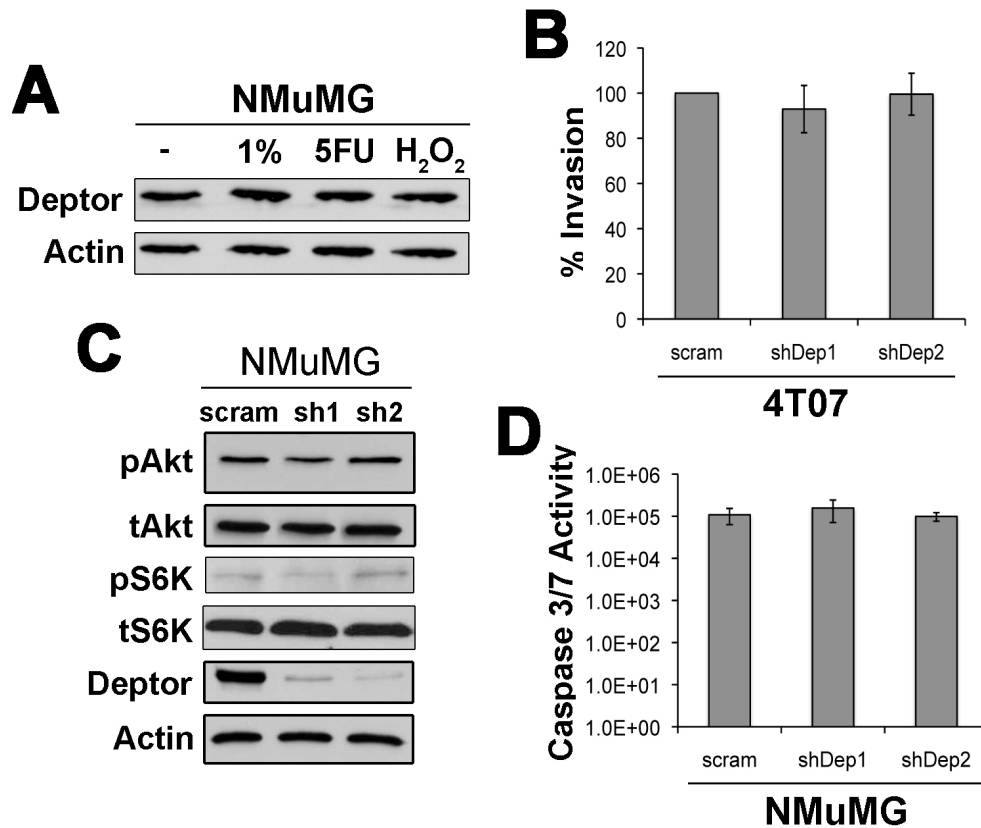

**Figure S2.** Deptor expression is unaffected by cellular stress, while Deptor-deficiency is insufficient to elicit EMT programs. (A) Deptor expression was evaluated in NMuMG cells that were cultured under different the following stress conditions: (i) untreated (-); (ii) serum-deprivation (% serum, 1%); (iii) 5-fluorouracil (5-FU, 10  $\mu$ M); and (iv) hydrogen peroxide (H<sub>2</sub>O<sub>2</sub>, 50  $\mu$ M). Immunoblots are representative of 2 independent experiments. Deptor-deficiency was insufficient in altering the invasion of 4T07 cells (B), the activation status of AKT and S6K in NMuMG cells (C), or the activity of caspase-3/7 in NMuMG cells (D). Data in *Panel B* are representative immunoblots from 3 independent experiments, while those in *Panels C* and *D* are the mean ( $\pm$ SEM; n=3).
